# Supplementary material
Source: Springer Nature journal article supplement (https://www.springermedizin.de/resource/supplementary/13569_2014_68_MOESM7_ESM.pdf/9676766)

**A**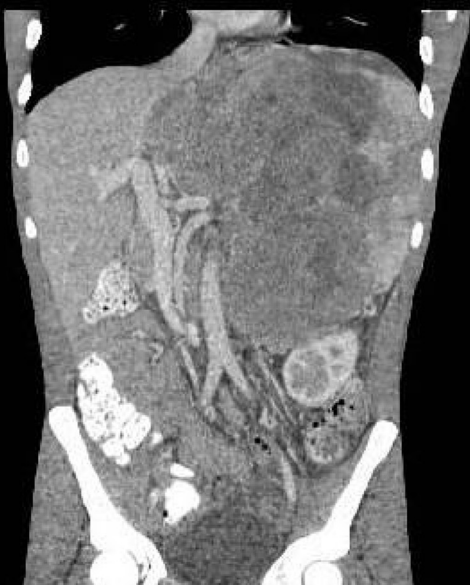

Coronal view

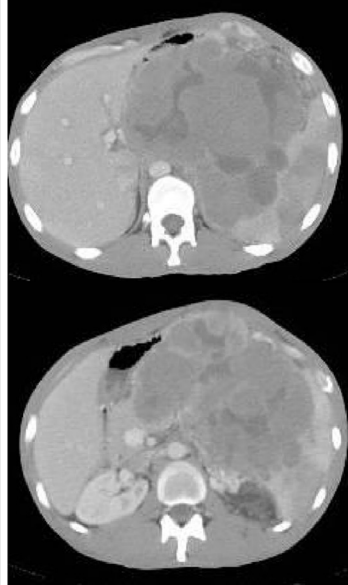

Axial views

CT prior to Imatinib therapy

**B**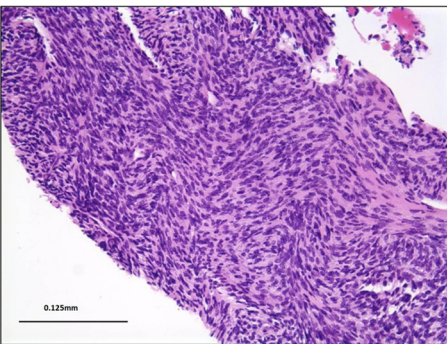**C**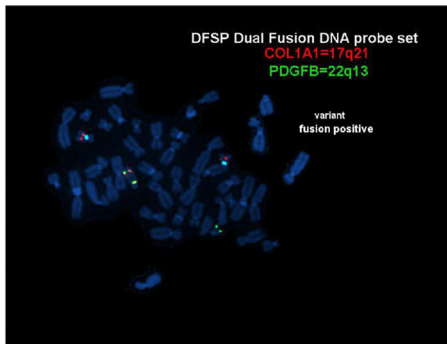

Supplement: MOESM7 [file 9676766]
